# Supplementary material
Source: Research Square preprint supplement (doi:10.21203/rs.3.rs-9453152/v1)
Supplement: Supplementary file 1 [file 6850f10c4b909b454aecc607.docx]

Table 3. Adverse Events: Maximum grade per patient regardless of attribution


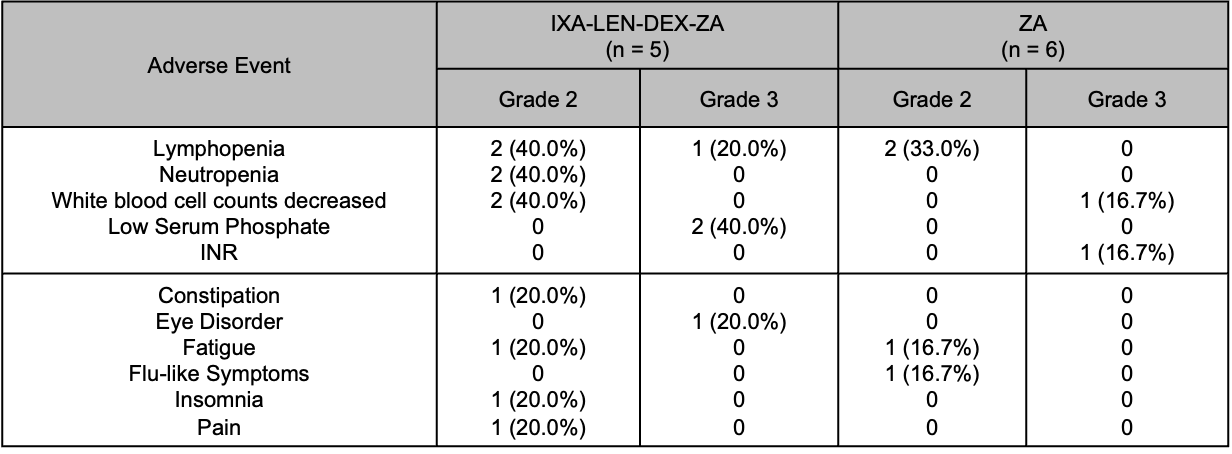


IXA: Ixazomib; LEN: Lenalidomide; DEX: Dexamethasone; ZA: zolendronic acid; n: number; INR: International normalized ratio
