# Supplementary material
Source: Research Square preprint supplement (doi:10.21203/rs.3.rs-9453152/v1)
Supplement: Supplementary file 3 [file e59c157d14bd6b3f5f7368cd.docx]

Table 2. Patient and Disease Characteristics at Study Entry by Treatment Arm
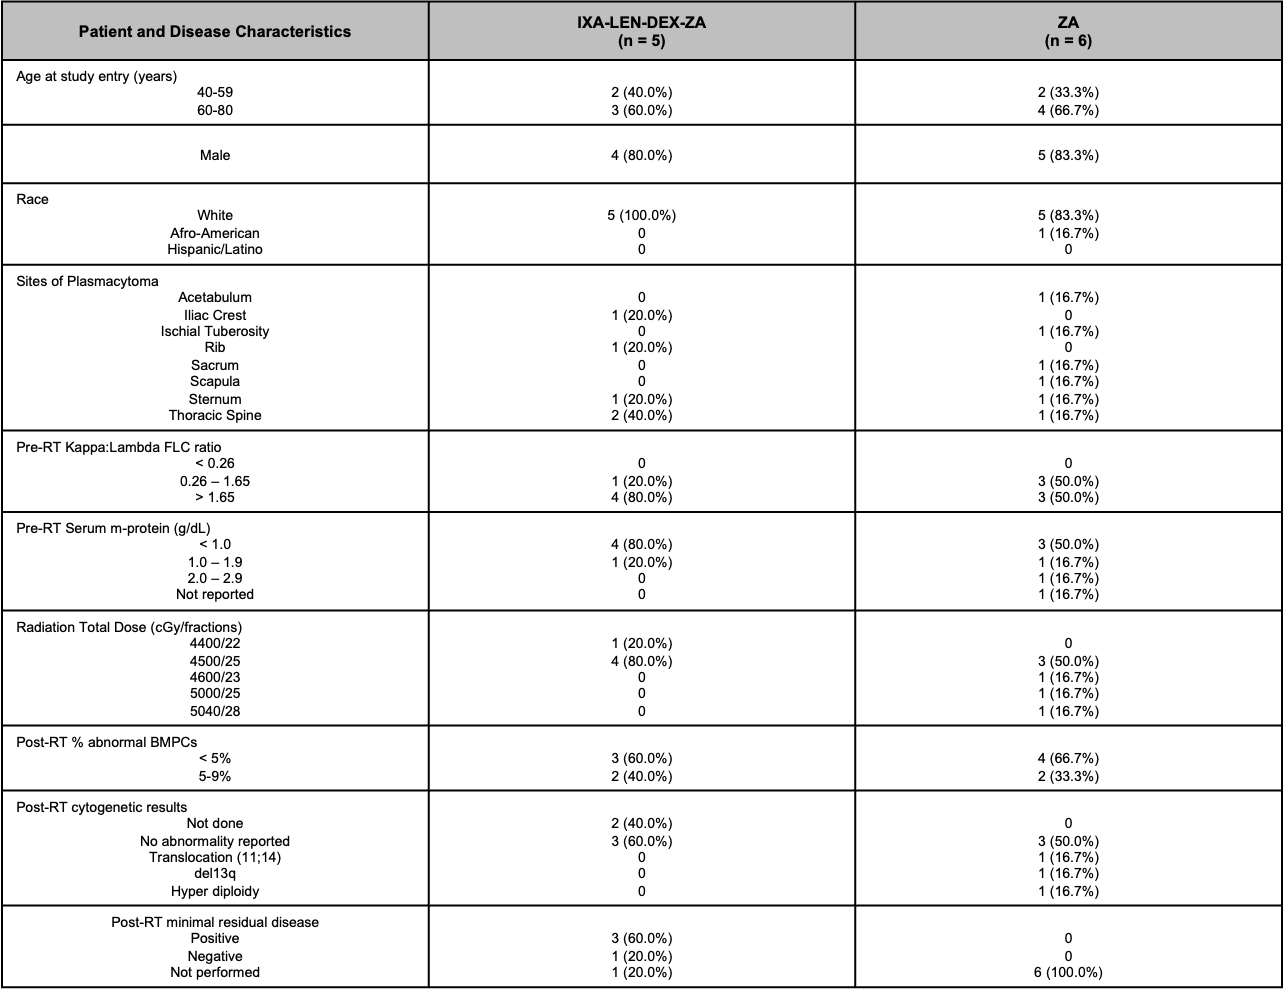


FLC: free light chain; g/dL: grams per deciliter; RT: radiation therapy; del: deletion; t: translocation; BMPC: bone marrow plasma cells; cGy: centigray
